# Supplementary material
Source: publisher figshare collection journal article supplement (https://sage.figshare.com/ndownloader/files/13890125)

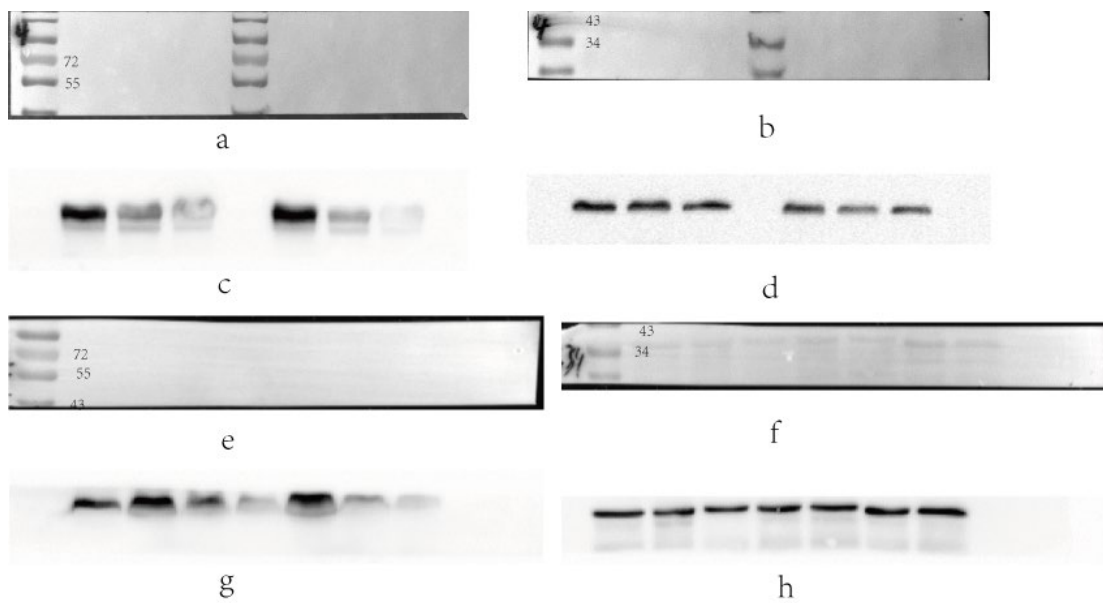

**Figure** Complete gel image without cropping and with better contrast

Supplement: Supplementary file 1 [file 13890125]
